# Supplementary material for: c-Jun N-terminal kinase 2 prevents luminal cell commitment in normal mammary glands and tumors by inhibiting p53/Notch1 and breast cancer gene 1 expression
Source: PubMed Central journal article supplement (PMC4494910; doi:10.18632/oncotarget.3787), 2015-04-25
Supplement: oncotarget-06-11863-s001.pdf [file oncotarget-06-11863-s001.pdf]

## SUPPLEMENTARY DATA

### *Supplemental Experimental Procedures:*

Primers used (all are against mouse, unless otherwise indicated):

qPCR primers:

*hes1* NM\_008235.2 (5'-CACAGAAAGTCATCAAAGCC and 5'-TGCTTGACAGTCATTTCCAG),  
*notch1* NM\_008714.3 (5'-CTACAGAAGGTTACACAG and 5'-CAGAGGTAGGAGTTGTCACG),  
*p53* NM\_001127233.1 (5'-TGAACCGCCGACCTATCCTTA and GGCACAAACACGAACCTCAAA),  
*twist1* NM\_011658.2 (5'-AATTCACAAGAATCAGGGCGTGTTGGG and 5'-TCTATCAGAATGCAGAGGTTGTTGGG),  
*snai1* NM\_011427.2 (5'-TCCAAACCCACTCGGATGTGAAGA and 5'-TTGGTGCTTGTGGAGCAAGGACAT),  
*snai2* NM\_011415.2 (5'-CACATTTCGAACCCACACATTGGCT and 5'-TGTGCCCTCAGGTTTGATCTGTCT),  
*zeb1* NM\_011546.3 (5'-CAGTGTTCATGTTTAAGAGCA and 5'-GTCTTTCATCCTGGTTTCCG),  
*klf4* NM\_010637.3 (5'-CATTATCAAGAGTCTATGCCA and 5'-CACAGTGGTAAGGTTTCTCG),  
*cdh1* NM\_009864.2 (5'-GCCAAGTACATCCTCTATTCTC and 5'-GCAACGAATCCCTCAAAGAC),  
*gapdh* NM\_008084.2 (5'-CGTGGAGTCTACTGGCGTCTTTCAC and 5'-CGGGGATGATGAGCCTTTTGGC),  
*brca1* NM\_009764.3 (5'-CCAAAGAAGTAATGACCGTG and 5'-GCTAACTATCCACTTTCCTCC),  
*gata-3* NM\_008091.3 (5'-ACGAATCCAGCACAGAAGG and 5'-ATGTCCTGCTCTCCTTG),  
*ck14* NM\_016958.1 (5'-TCTTCAGCAAGACAGAGGAG and 5'-CTCCAGGTTATTCTCCAGGG),  
*p63* NM\_001127259.1 (5'-GTTCAATGAGGGACAGATTGC and 5'-GAATTCAGTGCCAACCTGTG),  
Human *brca1* NM\_007294.3 (5'-CCCAGAAGAATTTATGCTCGT and 5'-CATTGACCACATCTCCTCTG),  
Human *gapdh* BC096440.1 (5'-AAGGTGAAGGTTCGGAGTCAA and 5'-AATGAAGGGGTCATTGATGG).  
ChIP primers:  
*p21* NC\_000006.11 (5'-GATTCCTTTCTATCAGCCC and GTCACAAGATACATACCACCT),  
*gapdh* NC\_000012.11 (5'-GCCAAAGACAGAAGCCAGGA and 5'-CAGGATAGGACTCAGGGAATACAG),  
*notch1* NC\_000068.7 (5'-GTGACCGTGGAACGTCTA 5'-CTGTCCTAGGGCTCCAC)

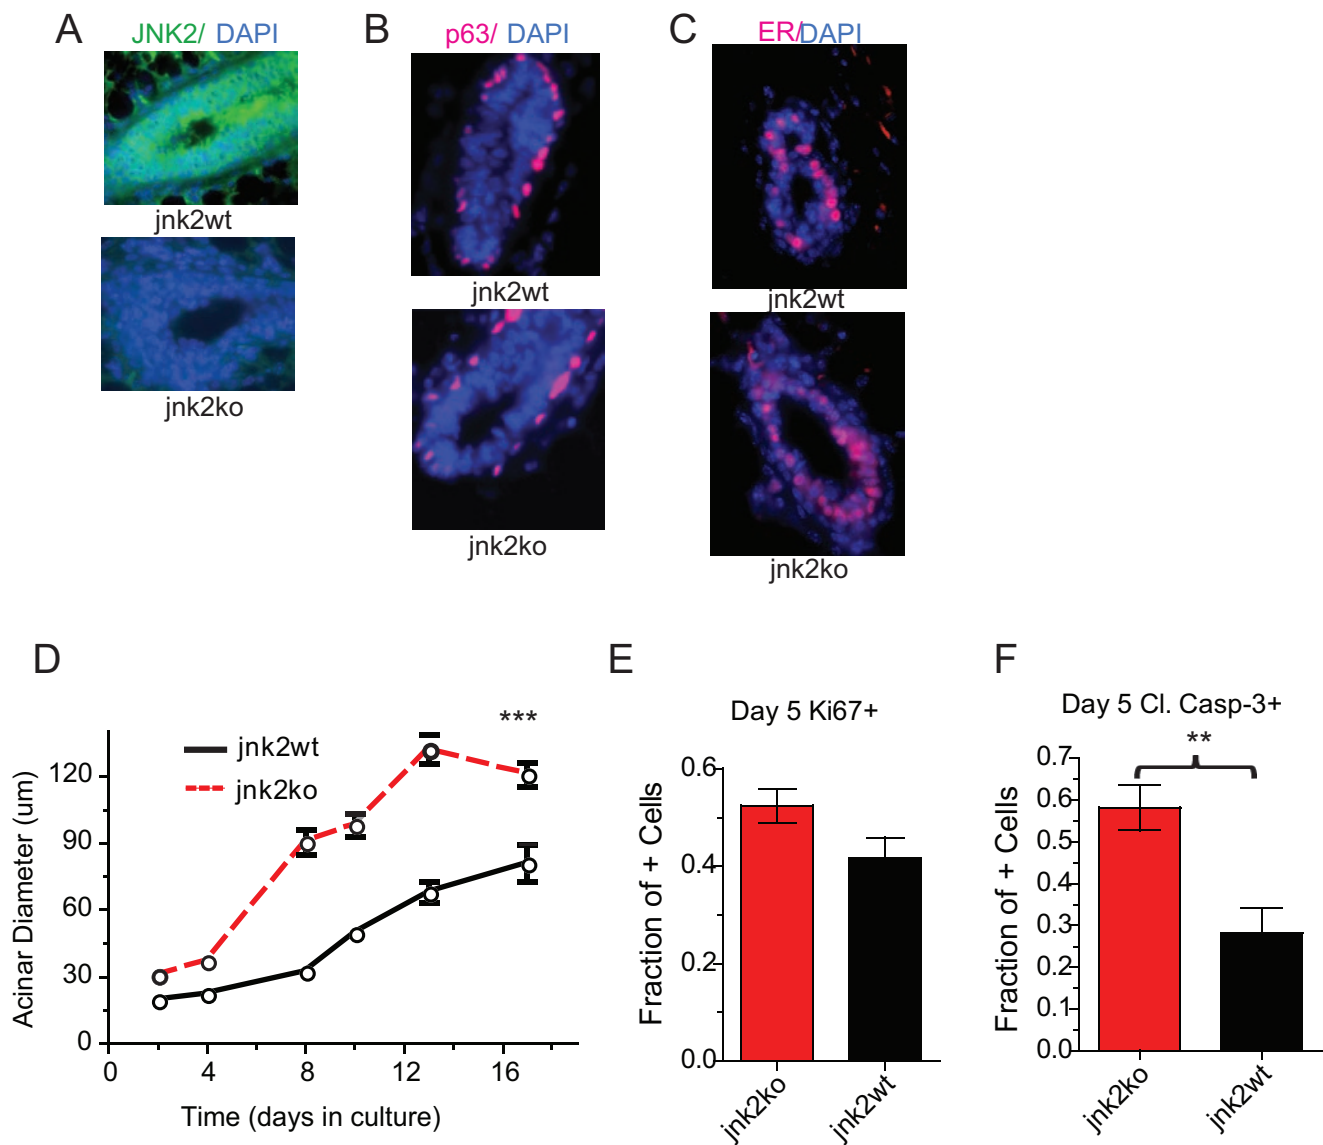

**Supplementary Figure S1: Effect of JNK2 on mammary epithelial cells.** **A.** Representative images of adult (8 wk-old) ducts probed for JNK2 expression; **B-C.** Images of p63<sup>+</sup> basal cells and ER<sup>+</sup> luminal cells in adult ducts ( $n = 3$ ); **D.** *Jnk2wt* and *jnk2ko* mammary epithelial cells were isolated and grown in 3D culture. Acinar diameter was measured at indicated time points. Linear regression analysis was performed,  $***p < 0.0001$ ; **E-F.** Quantification of Ki67<sup>+</sup> and cleaved caspase 3<sup>+</sup> cells grown in 3D culture. Nonparametric *t*-test was performed,  $**p < 0.001$ .

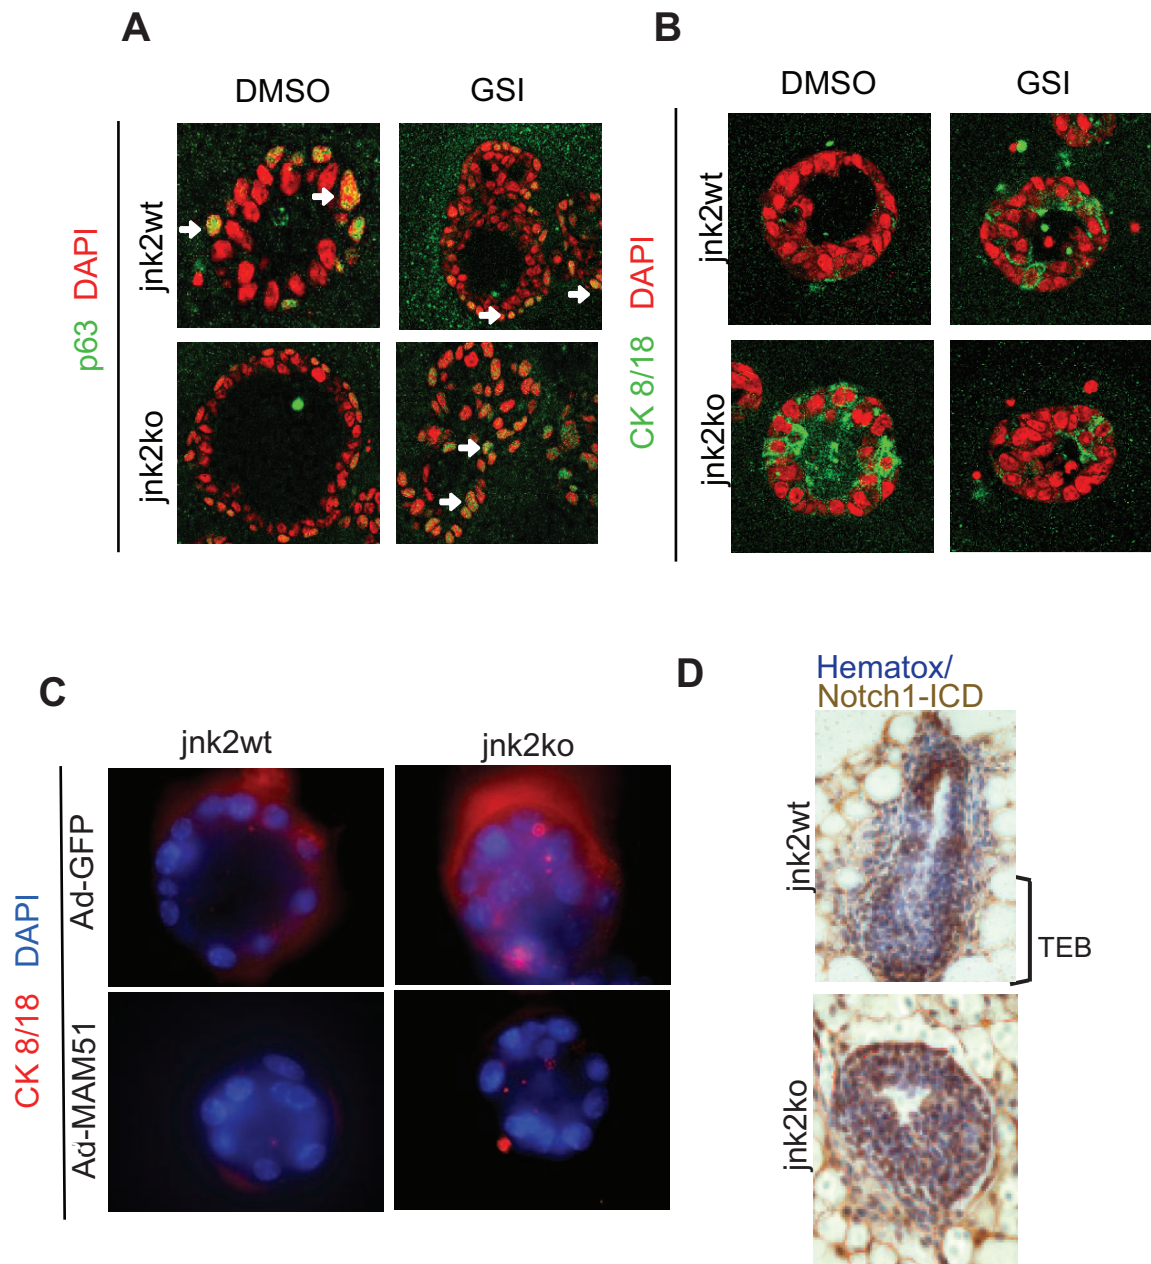

**Supplementary Figure S2: Representative images of JNK2 effects on mammary cell differentiation and Notch activity.** **A.** Representative staining where arrows indicate p63<sup>+</sup> cells in 3D culture; **B-C.** Representative staining of ER<sup>+</sup> mammary cells in 3D culture; **D.** Representative staining of Notch1<sup>ICD</sup> in TEBS.

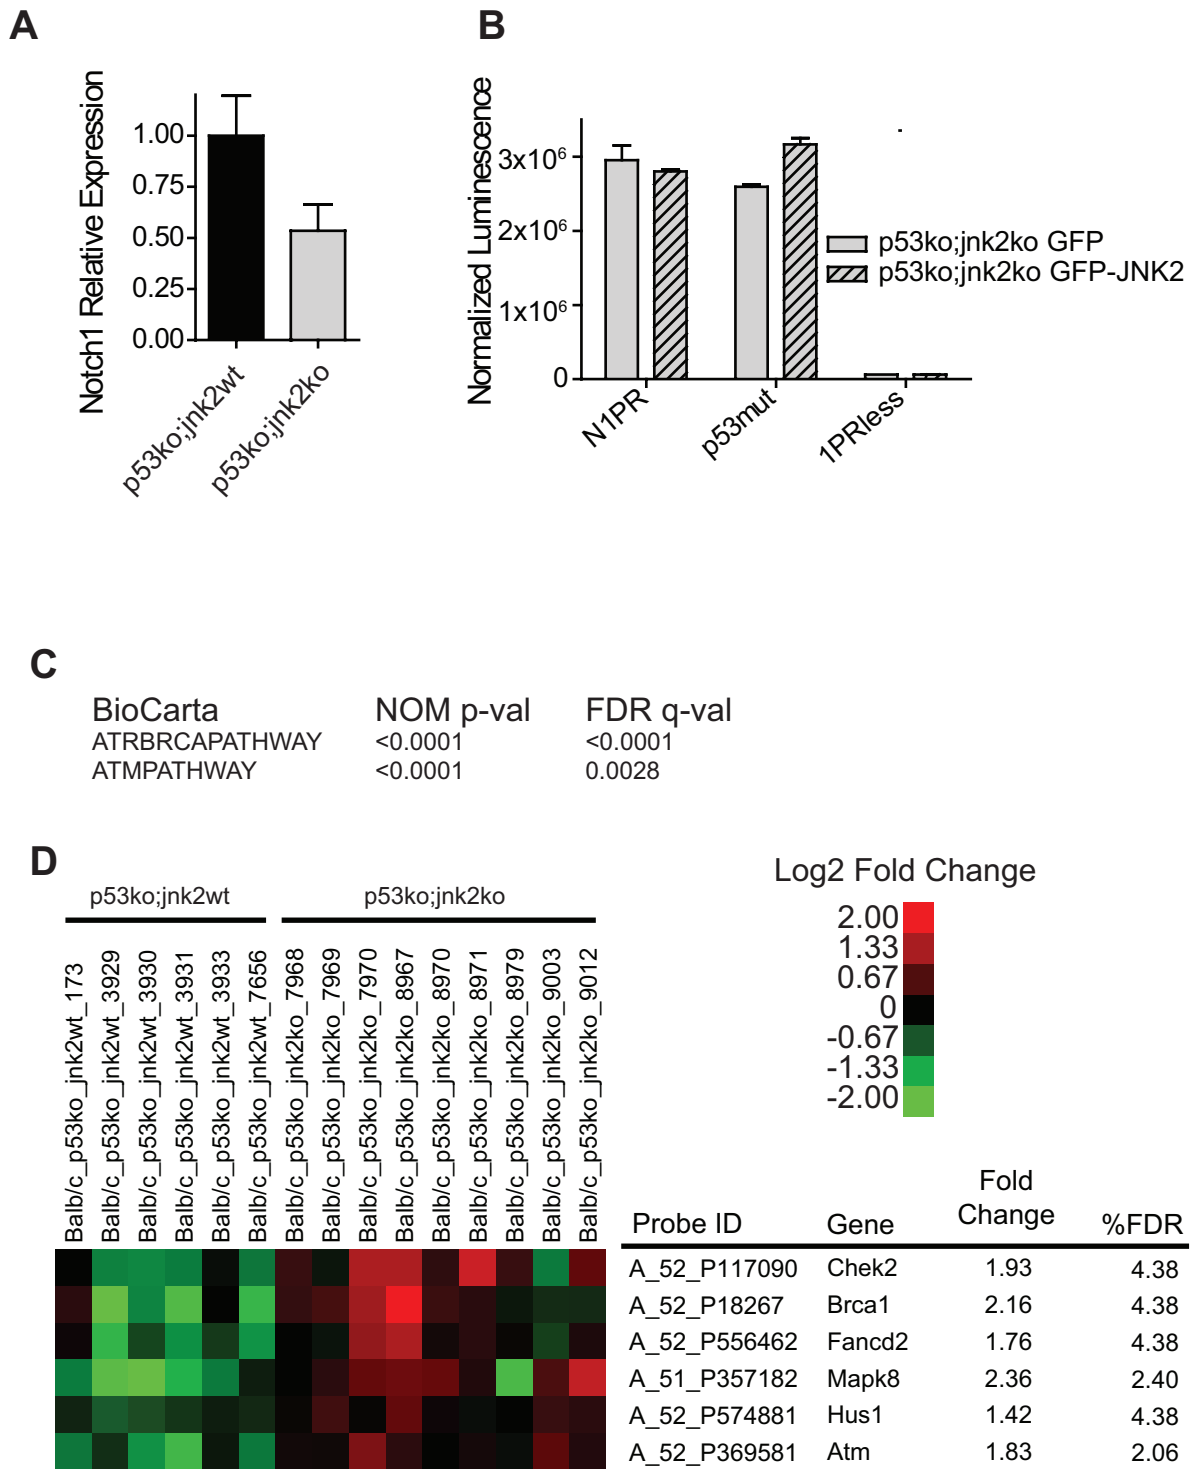

**Supplementary Figure S3: JNK2 effects on gene expression in *p53ko* tumors or tumor cell lines.** **A.** RNA from tumors was analyzed for Notch1 expression using qPCR. A nonparametric, two-tailed *t*-test was used to detect statistical differences between two groups; **B.** *p53ko;jnk2ko* GFP and GFP-JNK2 expressing cells were transfected with Notch1 promoter-luciferase constructs and analyzed for promoter activity. A 1 Way ANOVA with post-hoc *t*-test was performed; **C.** Gene Set Enrichment Analysis (GSEA) of *p53ko;jnk2ko* and *p53ko;jnk2wt* tumor microarrays shows upregulation of the ATRBRCPATHWAY and ATMPATHWAY gene sets in *jnk2ko* tumors; **D.** Genes significantly elevated with false discovery rate (FDR) of < 5% in the ATM/BRCA1 pathway.

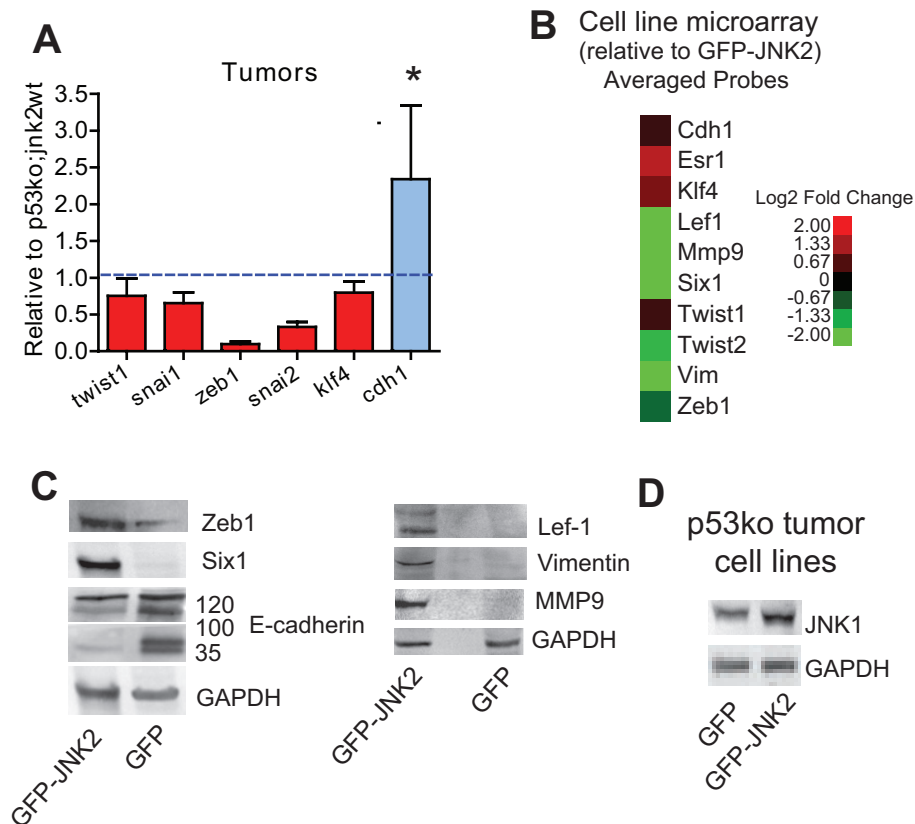

**Supplementary Figure S4: JNK2 promotes EMT in the p53ko tumor model.** **A.** Expression of mesenchymal/stem (red) and epithelial (blue) markers in *p53ko* tumors ( $n = 8$ ), **B.** Fold changes observed in microarray analysis of EMT/stem and differentiation markers in *p53ko;jnk2ko* GFP and GFP-JNK2 cell lines; **C.** Expression of EMT/stem-related proteins in *p53ko;jnk2ko* GFP and GFP-JNK2 cell lines by western blot; **D.** Expression of JNK1 in *p53ko;jnk2ko* GFP and GFP-JNK2 cell lines by western blot. A nonparametric, two-tailed *t*-test was also performed for A. \* $p < 0.05$ .

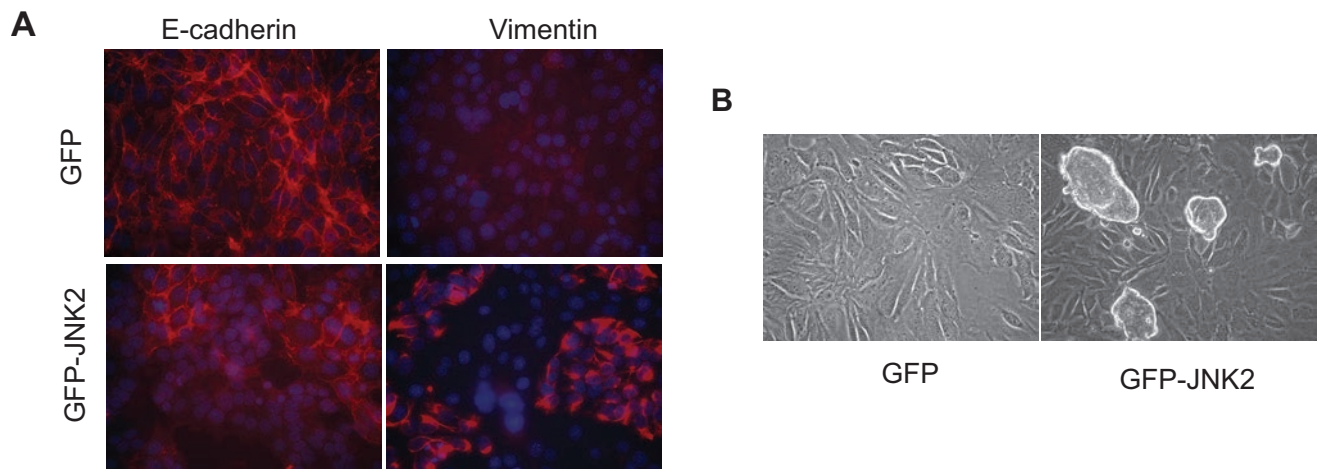

**Supplementary Figure S5: JNK2 promotes vimentin expression and inhibits e-cadherin in the *p53ko;jnk2ko* cell line.**  
A. Adherent cells were stained using vimentin and e-cadherin primary antibodies; B. Adherent cells grown in culture.
